## RESEARCH ARTICLE

# Phylogenic classification and virulence genes profiles of uropathogenic *E. coli* and diarrhegenic *E. coli* strains isolated from community acquired infections

Rasha M. Khairy<sup>1\*</sup>, Ebtisam S. Mohamed<sup>1</sup>, Hend M. Abdel Ghany<sup>2</sup>, Soha S. Abdelrahim<sup>1,3</sup>

**1** Department of Microbiology and Immunology, Faculty of Medicine, Minia University, Minia, Egypt, **2** Department of Biochemistry, Faculty of Medicine, Minia University, Minia, Egypt, **3** Department of Biomedical Sciences, College of Medicine, King Faisal University, Al-Ahsa, Saudi Arabia

\* [rashakhiry1@gmail.com](mailto:rashakhiry1@gmail.com)

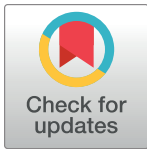

## OPEN ACCESS

**Citation:** Khairy RM, Mohamed ES, Abdel Ghany HM, Abdelrahim SS (2019) Phylogenic classification and virulence genes profiles of uropathogenic *E. coli* and diarrhegenic *E. coli* strains isolated from community acquired infections. PLoS ONE 14(9): e0222441. <https://doi.org/10.1371/journal.pone.0222441>

**Editor:** Praveen Thumbikat, Northwestern University, UNITED STATES

**Received:** June 15, 2019

**Accepted:** August 29, 2019

**Published:** September 12, 2019

**Peer Review History:** PLOS recognizes the benefits of transparency in the peer review process; therefore, we enable the publication of all of the content of peer review and author responses alongside final, published articles. The editorial history of this article is available here: <https://doi.org/10.1371/journal.pone.0222441>

**Copyright:** © 2019 Khairy et al. This is an open access article distributed under the terms of the [Creative Commons Attribution License](https://creativecommons.org/licenses/by/4.0/), which permits unrestricted use, distribution, and reproduction in any medium, provided the original author and source are credited.

**Data Availability Statement:** All relevant data are within the paper and its Supporting Information files.

## Abstract

The emergence of *E. coli* strains displaying patterns of virulence genes from different pathotypes shows that the current classification of *E. coli* pathotypes may be not enough, the study aimed to compare the phylogenetic groups and urovirulence genes of uropathogenic *Escherichia coli* (UPEC) and diarrhegenic *E. coli* (DEC) strains to extend the knowledge of *E. coli* classification into different pathotypes. A total of 173 UPEC and DEC strains were examined for phylogenetic typing and urovirulence genes by PCR amplifications. In contrast to most reports, phylogenetic group A was the most prevalent in both UPEC and DEC strains, followed by B2 group. Amplification assays revealed that 89.32% and 94.29% of UPEC and DEC strains, respectively, carried at least one of the urovirulence genes, 49.5% and 31.4% of UPEC and DEC strains, respectively, carried  $\geq 2$  of the urovirulence genes, *fim H* gene was the most prevalent (66.9% and 91.4%) in UPEC and DEC strains respectively. Twenty different patterns of virulence genes were identified in UPEC while 5 different patterns in DEC strains. Strains with combined virulence patterns of four or five genes were belonged to phylogenetic group B2. Our finding showed a closer relationship between the DEC and UPEC, so raised the suggestion that some DEC strains might be potential uropathogens. These findings also provide different insights into the phylogenetic classification of *E. coli* as pathogenic or commensals where group A can be an important pathogenic type as well as into the classification as intestinal or extra-intestinal virulence factors.

## Introduction

*Escherichia coli* are normal inhabitants of gastrointestinal tract of humans and many animals, however some *E. coli* strains acquired specific virulence genes that enable them to cause intestinal and extra-intestinal infections in humans such as diarrhea and urinary tract infections [1]. Diarrhegenic *E. coli* (DEC) represent a leading bacterial cause of diarrhea all over the world.

**Funding:** The authors received no specific funding for this work.

**Competing interests:** The authors have declared that no competing interests exist.

DEC pathotypes are characterized by their specific virulence determinants [2]. *E. coli* strains causing extra-intestinal infections are known as extra-intestinal pathogenic *E. coli* (ExPEC) [3]. Molecular and epidemiological studies have identified ExPEC as a distinct *E. coli* type. ExPEC strains usually carry characteristic virulence factors that allow colonization of the host mucosa and conferring their pathogenic potential [4].

Urinary tract infection (UTI) is the most common extra-intestinal infection caused by *E. coli* [5], which occur mainly due to the spread of Uropathogenic Escherichia coli (UPEC) strains from the intestine to the urinary tract [6]. These strains become pathogenic by acquiring new virulence properties encoded by specific genes, allowing them to colonize host mucosal surfaces and invade the normally sterile urinary tract [5]. Surface virulence factors (adhesins) are very important virulence factor of UPEC as the main attachment factor, P fimbriae is associated with pyelonephritis and is encoded by *pap* genes. [7]. Other adhesins that act as virulence factors are S fimbrial adhesin, which is coded by *sfa* genes and Type 1 fimbriae which is encoded by the *fim* gene cluster [8, 9, 10, 11]. A part from adhesins, important virulence factors of UPEC strains are the toxins that cause an inflammatory response. The most important secreted virulence factor is a lipoprotein toxin called  $\alpha$ -haemolysin (HlyA) which is encoded by *hlyA* gene [12]. Regarding phylogenetic typing, *E. coli* strains are classified into four major phylogenetic groups (phylogroups) named as A, B1, B2, and D [13], moreover these phylogenetic groups are intertwined with virulence patterns [1]. Each *E. coli* type has characteristic patterns, which allow them to colonize and invade their host [14]. However, exceptions exist where some UPEC strains have been reported to carry DEC markers [15], on the other hand, some DEC strains carry virulence factors associated with UPEC [5, 15]. Interestingly, *E. coli* strains that carry genetic determinants from different *E. coli* pathotypes are now termed as “heteropathogenic *E. coli*” [14, 16, 17], so the current classification of *E. coli* pathotypes may be not enough [18, 19]. These findings raised the suggestion that some DEC strains might be potential uropathogens. The current study has investigated a collection of DEC and UPEC strains isolated from clinical cases regarding the presence of urovirulence determinants and phylogenetic grouping. The aim was to detect whether DEC strains share virulence properties with the UPEC pathotypes and to recognize their phylogenetic diversity.

## Materials and methods

A total of 173 *E. coli* strains were included in the study were recovered from patients of both sex and different ages presenting symptomatic UTIs and diarrhea. A total of 103 isolates were recovered from urine samples of patients with UTIs (UPEC) during outpatient treatment (patients who visited an acute day ward were considered to be outpatients). *E. coli* UTI was diagnosed by clinical symptoms such frequency, urgency, dysuria, small-volume voids or lower abdominal pain in addition to urine culture with a colony count  $>10^5$  CFU *E. coli*/ml in midstream urine sample. Seventy strains were recovered from the stool samples of patients with diarrhea (DEC) during outpatient treatment. Diarrhea was diagnosed by, passage of loose stools for three times or more daily, in addition to one or more of characteristic clinical symptoms (nausea, vomiting, abdominal pain or cramps, fecal urgency, or dysentery). The samples of the study were collected from outpatients' clinics, Minia University Hospitals, Egypt during the period from January to March 2018.

## Ethics statement

The study protocol was approved by Minia Faculty of Medicine Review Board (code: 46 A at 2/1/2018). Written informed consents were obtained from all patients for the use of their samples.

## Bacterial isolates

Urine samples were cultured on chromogenic media (CHROMagar™ Orientation, Paris, France), while diarrhea samples were cultured on MacConkey and EMB agar. The isolates were confirmed as *E. coli* by standard bacteriological and biochemical tests including indole, urease, citrate and sugar fermentation tests. *E. coli* as the sole urine and stool Cultures micro-organism were only included. Strains confirmed as *E. coli* were kept in trypticase soy broth with sterilized 15% glycerol at  $-20^{\circ}\text{C}$ . The DEC strains were identified as enteroaggregative *E. coli* (EAEC) by PCR technique [20].

## DNA extraction

DNA was extracted by using the QIAamp DNA extraction Mini kit (Qiagen, Hilden, Germany) according to manufacturer's instructions. DNA was used immediately or stored at  $-20^{\circ}\text{C}$  until used.

## Phylogenetic analysis

*E. coli* isolates were classified into phylogenetic groups by targeting two marker genes (*chuA* and *yjaA*) and a DNA fragment TSPE4.C2 (Table 1) by triplex PCR as described previously [21]. Additional sub-grouping scheme proposed by Branger *et al*, 2005 was used [22].

## Detection of virulence genes

Specific primers were used to amplify sequences of 6 different virulence genes. Primer sequences and predicted sizes of the PCR products are shown in (Table 1). The amplification reactions were carried out using Biometra, UNO II thermal cycler (Goettingen, Germany) under the following conditions: initial denaturation at  $95^{\circ}\text{C}$  for 5 min, followed by 35 cycles of: 30 s at  $94^{\circ}\text{C}$  for, 30s at  $63^{\circ}\text{C}$ , then 30 s at  $72^{\circ}\text{C}$ , with a final extension step at  $72^{\circ}\text{C}$  for 5 min. PCR was performed in a 25 ml reaction mixture containing 1 ul of template DNA (\*100 ng/ml), 12.5 ml of PCR mastermix (Maxima Hot Start Green PCR Master Mix, USA), and 1 ul (10 pmol) of each primer and 9.5 ml of nuclease free water. PCR products were resolved on 2% agarose gel and visualized under a UV transilluminator (Biometra).

## Statistical analysis

The chi-square test or the Fisher's exact test was used.  $P < 0.05$  was considered statistically significant (two-tailed).

## Results

Phylogenetic grouping and virulence genes were characterized in 103 UPEC isolates and 70 DEC isolates (EAEC) using PCR assay. Regarding the phylogenetic analysis, the predominant groups were A<sub>1</sub> (31.1% UPEC, 37.1% DEC) with no significant difference ( $p$  value = 0.723); A<sub>0</sub> (23.3% UPEC, 12.9% DEC;  $p$  value = 0.068) followed by group B<sub>2</sub> then group D<sub>1</sub>. Phylogenetic groups D<sub>2</sub> and B<sub>1</sub> were detected only in UPEC isolates and were not detected in DEC isolates. There were no significant difference between phylogenetic distribution in UPE and DEC isolates (Fig 1 and S1 Fig). Six virulence genes were examined in 103 UPEC isolates and 70 DEC isolates (EAEC) to compare between the virulence repertoires of them. The six studied virulence genes were detected in UPEC isolates while only 4 genes were detected in DEC isolates. The most frequently detected virulence gene in UPEC and DEC isolates was *fimH* (UPEC isolates:  $n = 69/103$ , 66.9%; DEC isolates:  $n = 64/70$ , 91.4%). The frequencies of *iroN* gene were detected in a similar percentage for both types of isolates; (UPEC:  $37/103$ , 35.9%; DEC:  $25/70$ ,

Table 1. Primers sequences used for PCR assays.

| Genes                | Primer sequence                                               | Size fragment (bp) | Reference |
|----------------------|---------------------------------------------------------------|--------------------|-----------|
| <i>CVD432</i>        | CTGGCGAAAGACTGTATCAT<br>CAATGTATAGAAATCCGCTGTT                | 630                | [20]      |
| <i>ChuA</i>          | F-GACGAACCAACGGTCAGGAT<br>R-TGCCGCCAGTACCAAAGACA              | 279                | [21]      |
| <i>yjaA</i>          | F-TGAAGTGTTCAGGAGACGCTG<br>R-ATGGAGAATGCGTTCCTCAAC            | 211                | [21]      |
| <i>TspE4C2</i>       | F-GAGTAATGTCGGGGCATTCA<br>R-CGCGCCAACAAAGTATTACG              | 154                | [21]      |
| <i>fimH</i>          | F: TGCAGAACGGATAAGCCGTGG<br>R: CGAGTCACCTGCCCTCCGGTA          | 506                | [23]      |
| <i>Sfa (sfa/foc)</i> | F: CTCCGGAGAACTGGGTGCATCTTAC<br>R: CGGAGGAGTAATTACAAACCTGGCA  | 410                | [24]      |
| <i>pap A</i>         | F: ATGGCAGTGGTGTTTTGGTG<br>R:CGTCCCACCATACTGTCTCTTC           | 720                | [23]      |
| <i>pap E/F</i>       | F: GCAACAGCAACGCTGGTTGCATCAT<br>R: AGAGAGAGCCACTCTTATACGGACA  | 336                | [25]      |
| <i>hly A</i>         | F: AACAAAGGATAAGCACTGTTCTGGCT<br>R: ACCATATAAGCGGTCATTCCCGTCA | 1170               | [25]      |
| <i>iroN</i>          | F AAGTCAAAGCAGGGGTGCCCCG<br>R GACGCCGACATTAAGACGCAG           | 665                | [26]      |

<https://doi.org/10.1371/journal.pone.0222441.t001>

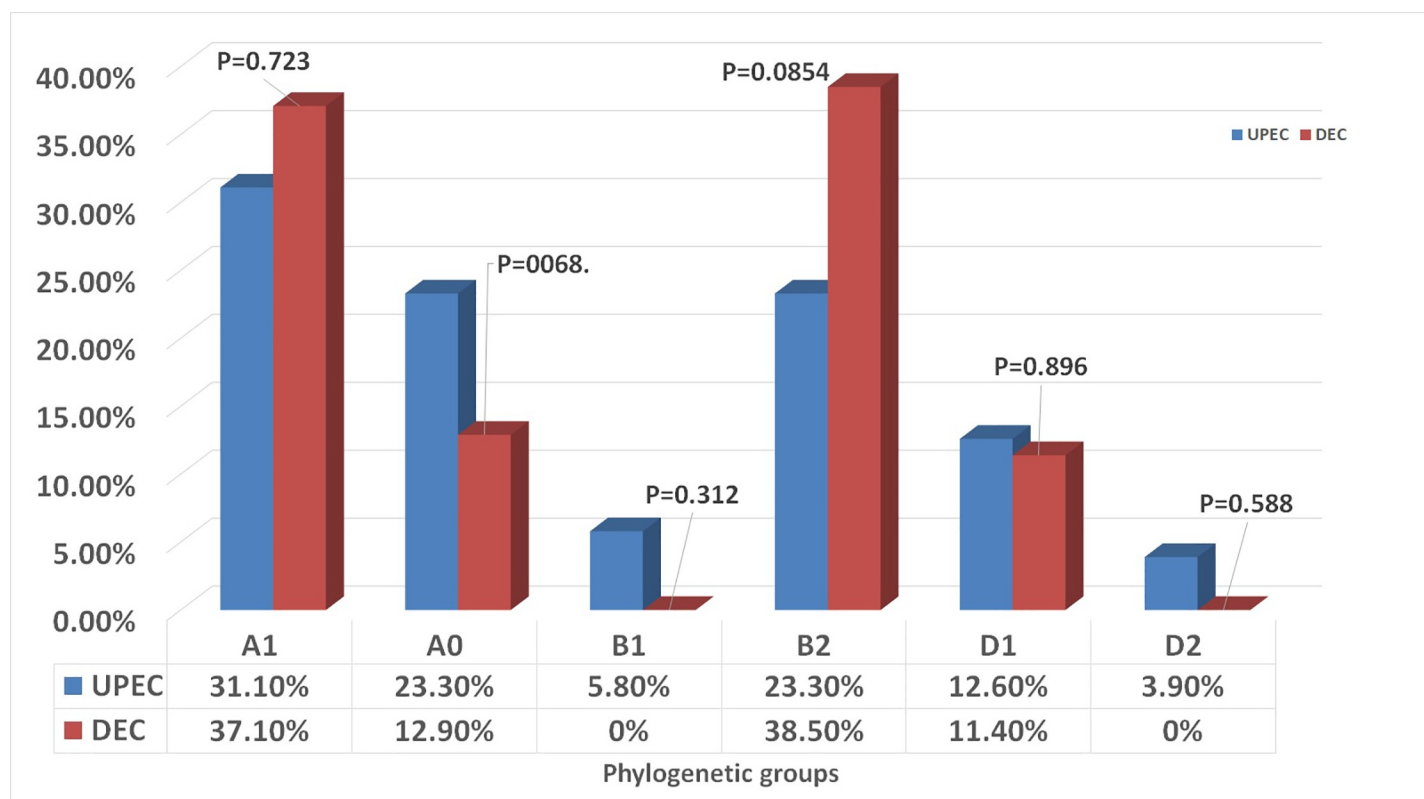

Fig 1. Phylogenetic distribution of UPEC and DEC isolates.

<https://doi.org/10.1371/journal.pone.0222441.g001>

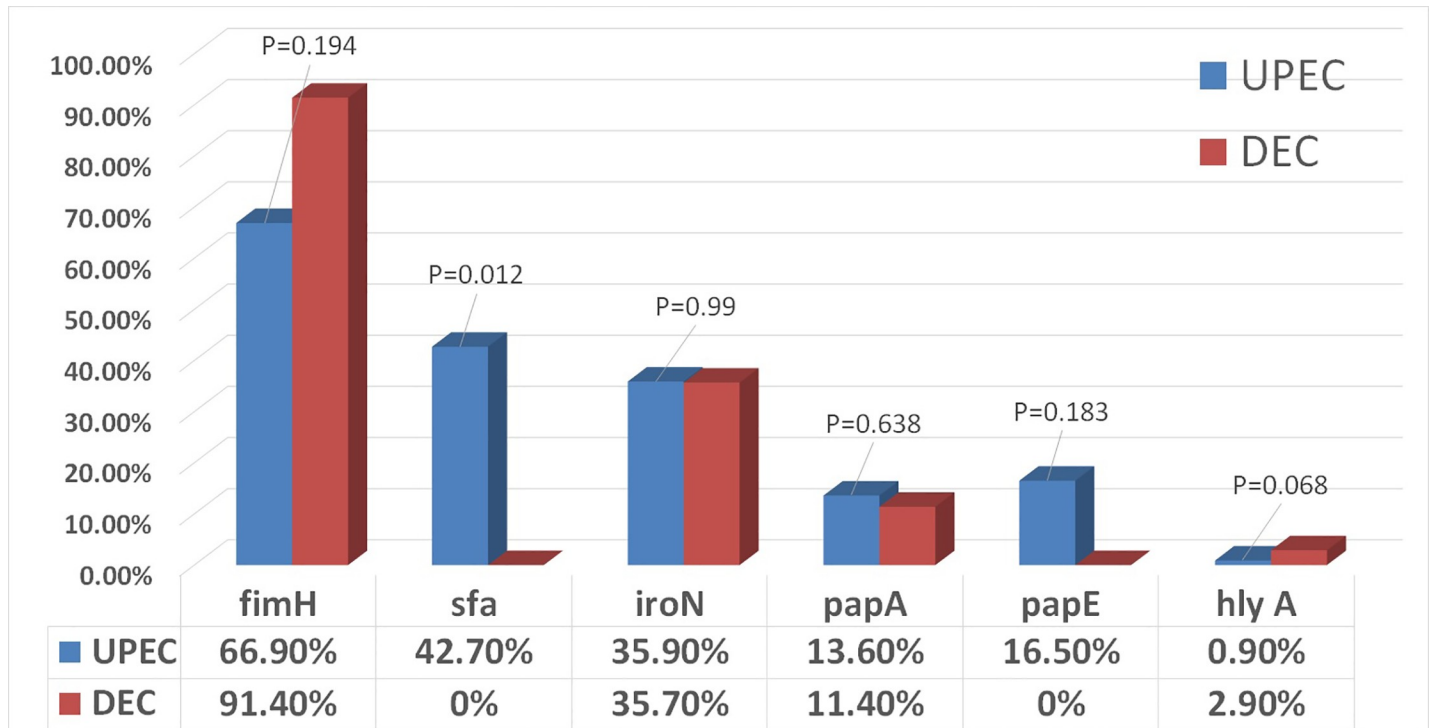

Fig 2. Distribution of the virulence genes among UPEC & DEC isolates.

<https://doi.org/10.1371/journal.pone.0222441.g002>

35.7%). *papA* gene was detected in a percentage of (UPEC isolates: 14/103, 13.5%; DEC isolates: 8/70, 11.4%) and *hlyA* gene was found in only one isolate of UPEC (0.9%) and 2 isolates of DEC (2.9%). The *sfa* and *papE* genes were detected in UPEC isolates in (44/103, 42.7%) and (17/103, 17.1%) respectively but were not detected in DEC isolates at all. There were no significant differences between virulence genes in UPEC and DEC isolates, except for *sfa* gene (p value = 0.012) (Fig 2 and S2–S6 Figs).

Based on the distribution of the various genes, all the studied strains exhibited 21 virulence gene patterns, referred to as Ec (Table 2). UPEC isolates showed 20 Ec patterns while DEC isolates showed 5 Ec patterns only. Ec1 was characterized by the presence of the *fimH* gene only which was the most noted pattern and found in 24 UPEC isolates (23.3%) and 44 DEC isolates (62.9%). Ec3 (*fimH* & *iroN* genes) was the most frequent combined virulence pattern (11, 10.67% of UPEC and 14, 20%) of DEC isolates) followed by Ec5 (*fimH* & *sfa* genes; 9, 8.7% of UPEC isolates) and Ec10 (*fimH*, *papE* & *iroN*), (3, 2.91% of UPEC; 6, 8.57% of DEC isolates). The distribution of virulence patterns in phylogenetic groups are summarized in Table 2.

### Discussion

Each *E. coli* type has characteristic phylogenetic and virulence patterns, which allow them to colonize and invade their host [14]. The phylogenetic analysis classify *E. coli* pathotypes into 4 major phylogenetic groups A, B1, B2 and D [13]. Several previous studies have reported that B2 and D phylogroups are the most common among UPEC isolates [27, 28], while isolates in phylogenetic groups A and B1 were mostly identified as commensal *E. coli* isolates [29]. Our study has reported different findings, where the predominant phylogenetic group in UPEC isolates was A<sub>1</sub> (31.1%), followed by B<sub>2</sub> (23.3%), A<sub>0</sub> (23.3%), and lastly D<sub>1</sub> (12.6%), that agree with some previous studies [30, 31]. The predominance of phylogenetic group A in UPEC

Table 2. Virulence patterns (EC) distribution among Phylogenetic groups of UPEC and DEC *E.coli* isolates.

| Virulence pattern | Phylogenetic group |                |                |                  |                  |                |                | Isolates N (%) |            |
|-------------------|--------------------|----------------|----------------|------------------|------------------|----------------|----------------|----------------|------------|
|                   | A <sub>0</sub>     | A <sub>1</sub> | B <sub>1</sub> | B <sub>2 2</sub> | B <sub>2 3</sub> | D <sub>1</sub> | D <sub>2</sub> | UPEC           | DEC        |
| Ec1(UPEC/DEC)     | 9 /5               | 8/16           | 1/-            | 2/6              | 1/11             | 3/6            | -              | 24 (23.3%)     | 44 (62.9%) |
| Ec2               | 2                  | 2              | -              | 1                | 6                | 1              | -              | 12(11.65%)     | 0          |
| Ec3(UPEC/DEC)     | 2/2                | 5/8            | 1              | -/2              | 1/2              | 2              | -              | 11(10.67%)     | 14 (20%)   |
| Ec4(UPEC/DEC)     | 5/2                | 3/2            | 1              | -                | -                | 1              | 1              | 11(10.67%)     | 4 (5.71%)  |
| Ec5               | 3                  | 5              | -              | -                | -                | 1              | -              | 9 (8.7%)       | 0          |
| Ec6               | -                  | 2              | -              | 2                | 2                | -              | -              | 6 (5.8%)       | 0          |
| Ec7               | -                  | 1              | 2              | 2                | -                | -              | -              | 5 (4.85%)      | 0          |
| Ec8               | -                  | 1              | -              | -                | -                | 2              | -              | 3 (2.91%)      | 0          |
| Ec9               | -                  | -              | 1              | -                | -                | 2              | -              | 3 (2.91%)      | 0          |
| Ec10(UPEC/DEC)    | -                  | -              | -              | 1/2              | -/2              | -/2            | 2              | 3 (2.91%)      | 6 (8.57%)  |
| Ec11              | -                  | -              | -              | -                | -                | 1              | 1              | 2 (1.94%)      | 0          |
| Ec12              | -                  | 1              | -              | 1                | -                | -              | -              | 2 (1.94%)      | 0          |
| Ec13              | 2                  | -              | -              | -                | -                | -              | -              | 2 (1.94%)      | 0          |
| Ec14              | -                  | -              | -              | -                | 2                | -              | -              | 2 (1.94%)      | 0          |
| Ec15              | -                  | -              | -              | 2                | -                | -              | -              | 2 (1.94%)      | 0          |
| Ec16              | -                  | 2              | -              | -                | -                | -              | -              | 2 (1.94%)      | 0          |
| Ec17              | -                  | 1              | -              | -                | -                | -              | -              | 1 (0.97%)      | 0          |
| Ec18              | -                  | 1              | -              | -                | -                | -              | -              | 1 (0.97%)      | 0          |
| Ec19              | 1                  | -              | -              | -                | -                | -              | -              | 1 (0.97%)      | 0          |
| Ec20              | -                  | -              | -              | -                | 1                | -              | -              | 11 (0.97%)     | 0          |
| Ec21(UPEC/DEC)    | -                  | -              | -              | -/2              | -                | -              | -              | 0              | 2 (2.86%)  |
| total(UPEC/DEC)   | 24/9               | 32/26          | 6/-            | 11/12            | 13/15            | 13/8           | 4/-            | 103(100%)      | 70(100%)   |

UPEC, uropathogenic *E.coli*; DEC, Diarrhegenic *E.coli*; Ec1include (*fimH* gene); Ec2 (*sfa* gene); Ec3 (*fimH* and *iroN* genes); Ec4 (no genes detected); Ec5 (*fimH* and *sfa*); Ec6 (*fimH*, *sfa*, *papE* and *iroN* genes); Ec7 ((*fimH*, *sfa* and *iroN* genes); Ec8 (*fimH* and *papA*); Ec9 (*papE*); Ec10 (*fimH*, *papA* and *iroN* genes); Ec11 (*sfa* and *iroN* genes); Ec12 (*fimH*, *sfa*, *papE*); Ec13 (*sfa*, *papA* and *iroN* genes); Ec14 (*sfa*, *papA*, *papE* and *iroN* genes); Ec15 (*fimH*, *sfa*, *papA*, *papE* and *iroN* genes); Ec16 ((*fimH*, *papE* and *iroN* genes), Ec17 (*papA*); Ec18 (*papE*); Ec19 ((*fimH*, *sfa*, *papA*); Ec20 (*fimH*, *sfa*, *iroN* and *hly*); Ec21 (*fimH*, *iroN* and *hly* genes).

<https://doi.org/10.1371/journal.pone.0222441.t002>

isolates which is usually associated with commensal strains suggesting that the gastrointestinal tract is the main source of strains that colonize the urinary tract [32, 33]. The distribution of virulence genes and phylogenetic types varies among different countries, for example, group A was the most prevalent in Russia [34], and also in China [35] in UPEC, so our findings can be explained by geographical variation.

Phylogenetic group A was also the predominant in DEC isolates of the current study, where the frequency of A<sub>1</sub> type was (37.1%) and A<sub>0</sub> was (12.9%). The predominance of phylogenetic group A in DEC isolates suggesting that the source of gastrointestinal tract infection can be endogenous even in immunocompetent persons. Although several previous reports showed that group B2 *E.coli* strains are rare in fecal samples of healthy persons [36, 37], group B2 was recorded in a high percent (38.5%) in our DEC isolates so our data reveals that acquiring the group B2 strain is important for developing of infection. On the other hand, previous studies, which investigated DEC isolates in Costa Rica [38] and Peru [39], showed that most of the isolates belonged to B1 and D groups respectively that disagrees with our study and reflects the diversity of DEC isolates in different countries. In order to find possible link between strain phylogeny and virulence genes, we analyzed an overall virulence profile (*fimH*, *sfa*, *iroN*, *papA*, *papE* and *hly* A genes) in UPEC and DEC strains. The six studied virulence genes were

detected in UPEC isolates while only 4 genes were detected in DEC isolates. The most frequent gene was *fimH* gene (66.9% of UPEC isolates and 91.4% of DEC). A similar prevalence (65.9%) was detected in a previous study in Egypt [40] and also in other countries [41, 42]. For the other virulence genes *sfa*, *iroN*, *papA*, *papE* and *hly A*; the prevalence in our study was 42.7%, 35.9%, 13.6%, 16.5%, and 0.9% respectively in UPEC isolates. Our results were near to some studies in percent of *sfa* and *iroN* but the percent of *pap* and *hlyl* genes was lower [42]. Our results showed that the UPEC strains have different virulence profiles compared with other studies, suggesting that the virulence profile depends on the regional geography and climate or may be other factors.

The frequencies of urovirulence genes, *iroN* and *papA* detection in DEC were similar to that of UPEC isolates. There were no significant differences between virulence genes in UPEC and DEC isolates, except for *sfa* gene (p value = 0.012). About 66/70, 94.3% of DEC isolates carry at least one urovirulence gene. These findings showed a closer relationship between DEC specially EAEC and UPEC that may be explained by the remarkable genome plasticity or gene transfer in *E.coli* strains which leads to appearance of virulent strains displaying virulence genes from different pathotypes in a single isolate [18]. This interesting finding has shown that the classical classification of strains into pathotypes of *E.coli* is limited and inaccurate [19]. Our results showed that virulence genes were more prevalent in phylogroups A, so group A can be pathogenic and the other phylogroups as well. These findings also provide different insights into classification of *E.coli* pathotypes. A close relationship between the DEC and UPEC strains was reported, showing that DEC particularly the EAEC pathotype is an emerging enteropathogen which can cause intestinal and extra -intestinal infections, particularly in developing countries.

## Supporting information

### S1 Fig. PCR product for different phylogenetic types.

(TIF)

### S2 Fig. PCR product of Fim A gene (506bp).

(TIF)

### S3 Fig. PCR product of hly A gene (1170bp) and sfa gene (410bp).

(TIF)

### S4 Fig. PCR product of pap E gene (336bp).

(TIF)

### S5 Fig. PCR product of pap A gene (720bp).

(TIF)

### S6 Fig. PCR product of iroN A gene (665bp).

(TIF)

## Acknowledgments

We would like to thank the staff members of Minia University hospital for helping with the collection of samples

## Author Contributions

**Formal analysis:** Rasha M. Khairy, Soha S. Abdelrahim.

**Investigation:** Hend M. Abdel Ghany.

**Methodology:** Rasha M. Khairy, Ebtisam S. Mohamed, Soha S. Abdelrahim.

**Writing – original draft:** Rasha M. Khairy, Soha S. Abdelrahim.

**Writing – review & editing:** Rasha M. Khairy.

## References

1. Kaper JB, Nataro JP, Mobley HL. Pathogenic *Escherichia coli*. *Nat Rev Microbiol*. 2004; 2(2):123–40. <https://doi.org/10.1038/nrmicro818> PMID: 15040260
2. Abba K, Sinfield R, Hart CA, Garner P. Pathogens associated with persistent diarrhea in children in low and middle income countries: systematic review. *BMC Infect Dis*. 2009; 9: 1–15. <https://doi.org/10.1186/1471-2334-9-1> PMID: 19144106
3. Campos ACC, Andrade NL, Ferdous M, Chlebowicz MA, Santos CC, Correal JCD, et al. Comprehensive Molecular Characterization of *Escherichia coli* Isolates from Urine Samples of Hospitalized Patients in Rio de Janeiro, Brazil. *Front Microbiol*. 2018; 16: 9. 243.
4. Cyoia PS, Rodrigues GR, Nishio EK, Medeiros LP, Koga VL, Pereira AP, et al. Presence of virulence genes and pathogenicity islands in extraintestinal pathogenic *Escherichia coli* isolates from Brazil. *J. Infect. Dev. Ctries*. 2015; 9: 1068–1075. <https://doi.org/10.3855/jidc.6683> PMID: 26517481
5. Lara FB, Nery DR, de Oliveira PM, Araujo ML, Carvalho FR, Messias-Silva LC, et al. Virulence Markers and Phylogenetic Analysis of *Escherichia coli* Strains with Hybrid EAEC/UPEC Genotypes Recovered from Sporadic Cases of Extraintestinal Infections. *Front Microbiol*. 2017; (3) 8:146. <https://doi.org/10.3389/fmicb.2017.00146> PMID: 28217123
6. Xie J, Foxman B, Zhang L, Marrs CF. Molecular epidemiologic identification of *Escherichia coli* genes that are potentially involved in movement of the organism from the intestinal tract to the vagina and bladder. *J Clin Microbiol*. 2006; 44: 2434–2441. <https://doi.org/10.1128/JCM.00397-06> PMID: 16825361
7. Snyder JA, Lloyd AL, Lockett CV, Johnson DE, Mobley HL. Role of phase variation of type 1 fimbriae in a uropathogenic *Escherichia coli* cystitis isolate during urinary tract infection. *Infect Immun*. 2006; 74(2):1387–93. <https://doi.org/10.1128/IAI.74.2.1387-1393.2006> PMID: 16428790
8. Alizade H, Ghanbarpour R, and Aflatoonian MR. Virulence genotyping of *Escherichia coli* isolates from diarrheic and urinary tract infections in relation to phylogeny in southeast of Iran. *Trop. Biomed*. 2014; 31: 174–182. PMID: 24862058
9. Stordeur P, Bree A, Mainil J, Moulin-Schouleur M. Pathogenicity of pap-negative avian *Escherichia coli* isolated from septicemic lesions. *Microbes Infect*. 2004; 6(7): 637–45. <https://doi.org/10.1016/j.micinf.2004.03.006> PMID: 15158770
10. Simms AN, Mobley HL. Multiple genes repress motility in uropathogenic *Escherichia coli* constitutively expressing type 1 fimbriae. *J Bacteriol*. 2008; 190(10): 3747–56. <https://doi.org/10.1128/JB.01870-07> PMID: 18359812
11. Tarchouna M, Ferjani A, Ben-Selma W, Boukadida J. Distribution of uropathogenic virulence genes in *Escherichia coli* isolated from patients with urinary tract infection. *Int J Infect Dis*. 2013; 17(6):e450–3. <https://doi.org/10.1016/j.ijid.2013.01.025> PMID: 23510539
12. Wiles TJ, and Mulvey MA. The RTX pore-forming toxin  $\alpha$ -hemolysin of uropathogenic *Escherichia coli*: progress and perspectives. *Future Microbiology*. 2013; 8(1): 73–84. <https://doi.org/10.2217/fmb.12.131> PMID: 23252494
13. Doumith M, Day MJ, Hope, Wain J, and Woodford N. Improved multiplex PCR strategy for rapid assignment of the four major *Escherichia coli* phylogenetic groups. *J. Clin. Microbiol*. 2012; 50: 3108–3110. <https://doi.org/10.1128/JCM.01468-12> PMID: 22785193
14. Bielaszewska M, Schiller R, Lammers L, Bauwens A, Fruth A, Middendorf B, et al. Heteropathogenic virulence and phylogeny reveal phased pathogenic metamorphosis in *Escherichia coli* O2:H6. *EMBO Mol. Med*. 2014; 6: 347–357. <https://doi.org/10.1002/emmm.201303133> PMID: 24413188
15. Abe CM, Salvador FA, Falsetti IN, Vieira MA, Blanco J, Blanco JE, et al. Uropathogenic *Escherichia coli* (UPEC) strains may carry virulence properties of diarrhoeagenic *E. coli*. *FEMS Immunol. Med. Microbiol*. 2008; 52: 397–406. <https://doi.org/10.1111/j.1574-695X.2008.00388.x> PMID: 18336383
16. Toval F, Köhler C-D, Vogel U, Wagenlehner F, Mellmann A, Fruth A, et al. Characterization of *Escherichia coli* isolates from hospital inpatients or outpatients with urinary tract infection. *J.Clin.Microbiol*. 2014; 52: 407–418. <https://doi.org/10.1128/JCM.02069-13> PMID: 24478469



17. Ang CW, Bouts H, Rossen JW, VanderKuip M, VanHeerde M, and Bökenkamp A. Diarrhea, urosepsis and hemolytic uremic syndrome caused by the same heteropathogenic *Escherichia coli* strain. *Pediatr. Infect. Dis. J.* 2016; 35, 1045–1047. <https://doi.org/10.1097/INF.0000000000001226> PMID: 27195604
18. Gomes TAT, Elias WP, Scaletsky ICA, Guth BEC, Rodrigues JF, Piazza RMF, et al. Diarrheagenic *Escherichiacoli*. *Brazilian J. Microbiol.* 2016; 47: 3–30.
19. Robins-Browne RM, Holt KE, Ingle DJ, Hocking DM, Yang J, and Tauschek M. Are *Escherichia coli* pathotypes still relevant in the Era of Whole-genome sequencing? *Front. Cell. Infect. Microbiol.* 2016; 6:141. <https://doi.org/10.3389/fcimb.2016.00141> PMID: 27917373
20. Schmidt H, Knop C, Franke S, Aleksic S, Heesemann J, Karch H. Development of PCR for screening of enteroaggregative *Escherichia coli*. *J Clin Microbiol.* 1995; 33(3): 701–5. PMID: 7751380
21. Clermont O, Bonacorsi S, Bingen E. Rapid and simple determination of the *Escherichia coli* phylogenetic group. *Appl Environ Microbiol.* 2000; 66(10):4555–8. <https://doi.org/10.1128/aem.66.10.4555-4558.2000> PMID: 11010916
22. Branger C, Zamfir O, Geoffroy S, Laurans G, Arlet G, Thien HV, et al. Genetic background of *Escherichia coli* and extended-spectrum beta-lactamase type. *Emerg Infect Dis.* 2005; 11: 54–61. <https://doi.org/10.3201/eid1101.040257> PMID: 15705323
23. Le Bouguenec CM, Archambaud and A. Labigne. Rapid and specific detection of the *pap*, *afa*, and *sfa* adhesin-encoding operons in uropathogenic *Escherichia coli* strains by polymerase chain reaction. *J. Clin. Microbiol.* 1992; 30:1189–1193. PMID: 1349900
24. Yamamoto S, Terai A, Yuri K, Kurazono H, Takeda Y, Yoshida O. Detection of urovirulence factors in *Escherichia coli* by multiplex polymerase chain reaction. *FEMS Immunol Med Microbiol.* 1995; 12(2): 85–90. <https://doi.org/10.1111/j.1574-695X.1995.tb00179.x> PMID: 8589667
25. Johnson JR, Stell AL. Extended virulence genotypes of *Escherichia coli* strains from patients with urosepsis in relation to phylogeny and host compromise. *J Infect Dis.* 2000; 181: 261–72. <https://doi.org/10.1086/315217> PMID: 10608775
26. Johnson JR, Russo TA, Tarr PI, Carlino U, Bilge SS, Vary JC, et al. Molecular epidemiological and phylogenetic associations of two novel putative virulence genes, *iha* and *iroN* among *Escherichia coli* isolates from patients with urosepsis. *Infect Immun.* vol. 2000; 68: 3040–7. <https://doi.org/10.1128/iai.68.5.3040-3047.2000> PMID: 10769012
27. Lee JH, Subhadra B, Son YJ, Kim DH, Park HS, Kim JM, et al. Phylogenetic group distributions, virulence factors and antimicrobial resistance properties of uropathogenic *Escherichia coli* strains isolated from patients with urinary tract infections in South Korea. *Lett Appl Microbiol.* 2016; 62(1):84–90. <https://doi.org/10.1111/lam.12517> PMID: 26518617
28. Munkhdelger Y, Gunregjav N, Dorjpurev A, Juniichiro N. and Sarantuya J. Detection of virulence genes, phylogenetic group and antibiotic resistance of uropathogenic *Escherichia coli* in Mongolia. *J. Infect. Dev. Ctries.* 2017; 11(1): 51–57 <https://doi.org/10.3855/jidc.7903> PMID: 28141590
29. Katouli M. Population structure of gut *Escherichia coli* and its role in development of extra-intestinal infections. *Iran. J. Microbiol.* 2010; 2: 59–72. PMID: 22347551
30. Piatti G, Mannini A, Balistreri M, & Schito M. Virulence factors in urinary *Escherichia coli* strains: phylogenetic background and quinolone and fluoroquinolone resistance. *Journal of Clinical Microbiology.* 2008; 46(2): 480–487. <https://doi.org/10.1128/JCM.01488-07> PMID: 18057134
31. Adib N, Ghanbarpour R, Solatzadeh H, Alizade H. Antibiotic resistance profile and virulence genes of uropathogenic *Escherichia coli* isolates in relation to phylogeny. *Tropical Biomedicine.* 2014; 31(1): 17–25. PMID: 24862040
32. Moreno E, Andreu A, Perez T, Sabate M, Johnson JR, Prats G. Relationship between *Escherichia coli* strains causing urinary tract infection in women and the dominant faecal flora of the same hosts. *Epidemiology and Infection.* 2006; 134(5): 1015–1023. <https://doi.org/10.1017/S0950268806005917> PMID: 16438745
33. López-Banda DA, Carrillo-Casas EM, Leyva-Leyva M, Orozco-Hoyuela G, Manjarrez-Hernández AH, Arroyo-Escalante S, et al. Identification of Virulence Factors Genes in *Escherichia coli* Isolates from Women with Urinary Tract Infection in Mexico. *Biomed Res Int.* 2014; Article ID 959206, 10 P.
34. Grude N, Potaturkina-Nesterova NI, Jenkins A, Strand L, Nowrouzian FL, Nyhus J, Kristiansen BEA. Comparison of phylogenetic group, virulence factors and antibiotic resistance in Russian and Norwegian isolates of *Escherichia coli* from urinary tract infection. *Clin. Microbiol. Infect.* 2007; 13: 208–211. <https://doi.org/10.1111/j.1469-0691.2006.01584.x> PMID: 17328737
35. Tong Y, Sun S, Chi Y. Virulence genotype and phylogenetic groups in relation to chinese herb resistance among *Escherichia coli* from patients with acute pyelonephritis. *Afr. J. Tradit. Complement Altern. Med.* 2014; 11: 234–238 <https://doi.org/10.4314/ajtcam.v11i3.33> PMID: 25371588

36. Duriez P, Clermont O, Bonacorsi S, Bingen E, Chaventre A, Elion J, et al. Commensal *Escherichia coli* isolates are phylogenetically distributed among geographically distinct human populations. *Microbiology*. 2001; 147(6):1671–6.
37. Blyton MD, Cornall SJ, Kennedy K, Colligon P, Gordon DM. Sex-dependent competitive dominance of phylogenetic group B2 *Escherichia coli* strains within human hosts. *Environ Microbiol Rep*. 2014; 6(6): 605–10. PMID: [25756113](https://pubmed.ncbi.nlm.nih.gov/25756113/)
38. Pérez C, Gómez-Duarte OG, Arias ML. Diarrheagenic *Escherichia coli* in children from Costa Rica. *Am J Trop Med Hyg*. 2010; 83: 292–297. <https://doi.org/10.4269/ajtmh.2010.09-0412> PMID: [20682870](https://pubmed.ncbi.nlm.nih.gov/20682870/)
39. Mosquito S, Pons MJ, Riveros M, Ruiz J, Ochoa TJ. Diarrheagenic *Escherichia coli* phylogroups are associated with antibiotic resistance and duration of diarrheal episode. *Sci World J*. 2015; 610403.
40. Zaki ME and Elewa A. Evaluation of Uropathogenic Virulence Genes in *Escherichia coli* Isolated from Children with Urinary Tract Infection. *International Journal of Advanced Research*. 2015; 3(3): 165–173.
41. Karimian A, Momtaz H, Madani M. Detection of uropathogenic *Escherichia coli* virulence factors in patients with urinary tract infections in Iran. *African Journal of Microbiology*. 2012; 6(39): 6811–6816
42. Jalali HR, Eslami G, Fallah F, Pourbakhsh A. Genotyping of Virulence Factors of Uropathogenic *Escherichia coli* by PCR. *Novel Biomed*. 2015; 3(4):177–81.
